# Supplementary material for: Two-step vapor deposition of self-catalyzed large-size PbI2 nanobelts for high-performance photodetectors
Source: Royal Society of Chemistry journal article supplement (doi:10.1039/c8tc01180j), 2018-01-01
Supplement: c8tc01180j1.pdf [file c8tc01180j1.pdf]

*Electronic Supplementary Information for*

**Two-Step Vapor Deposition of Self-Catalyzed Large-Size PbI<sub>2</sub>  
Nanobelts for High-Performance Photodetectors**

Mingming Han,<sup>1#</sup> Jiamin Sun,<sup>1,2#</sup> Luozhen Bian,<sup>1,2#</sup> Zhou Wang,<sup>3</sup> Lei Zhang,<sup>4</sup> Yanxue Yin,<sup>1</sup>  
Zhaofeng Gao,<sup>1</sup> Fulin Li,<sup>1</sup> Qian Xin,<sup>1</sup> Longbin He,<sup>4</sup> Ning Han,<sup>3\*</sup> Aimin Song,<sup>1</sup> Zai-xing Yang<sup>1,2\*</sup>

<sup>1</sup>*Center of Nanoelectronics and School of Microelectronics, Shandong University, Jinan, 250100,  
P. R. China*

<sup>2</sup>*Shenzhen Research Institute of Shandong University, Shenzhen, 518057, P. R. China*

<sup>3</sup>*State Key Laboratory of Multiphase Complex Systems, Institute of Process Engineering, Chinese  
Academy of Sciences, Beijing, 100190, P. R. China*

<sup>4</sup>*SEU-FEI Nano-Pico Center, Key Lab of MEMS of Ministry of Education, Collaborative Innovation  
Center for Micro/Nano Fabrication, Device and System, Southeast University, Nanjing, 210096, P.  
R. China*

\* Address Correspondence to N. H. (nhan@ipe.ac.cn), and Z.-x. Y. (zaixyang@sdu.edu.cn).

# These authors contributed equally to this work.

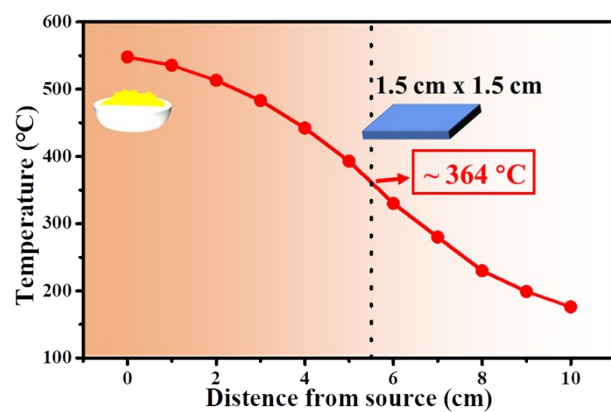

**Fig.S1** The temperature profile of the downstream zone.

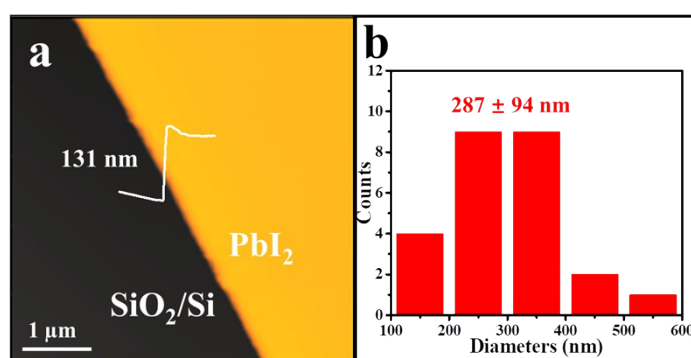

**Fig.S2** AFM image of PbI<sub>2</sub> nanobelt and histogram of thickness.

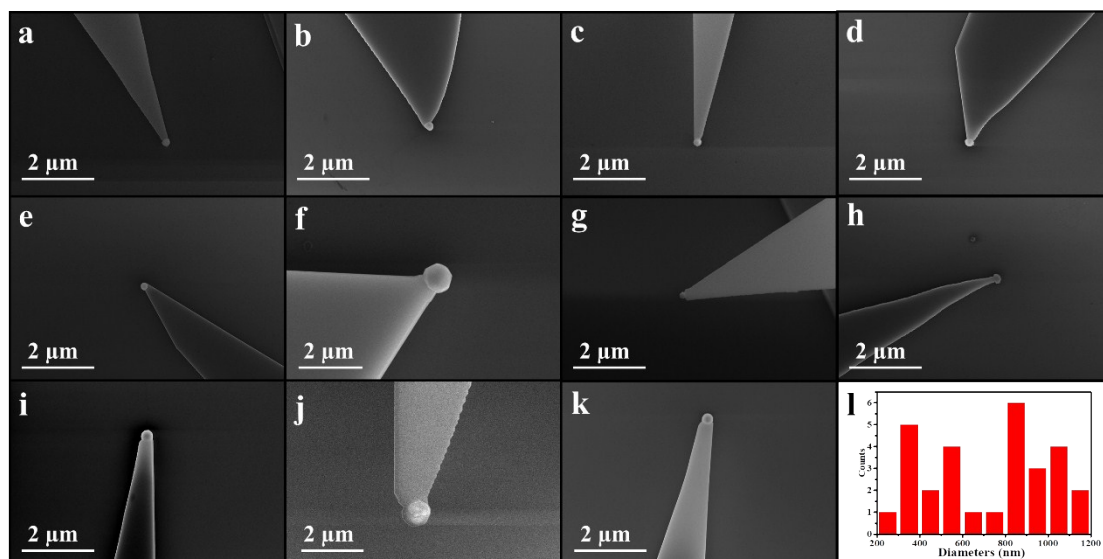

**Fig.S3** SEM images of the tip sections of the as-prepared PbI<sub>2</sub> nanobelts.

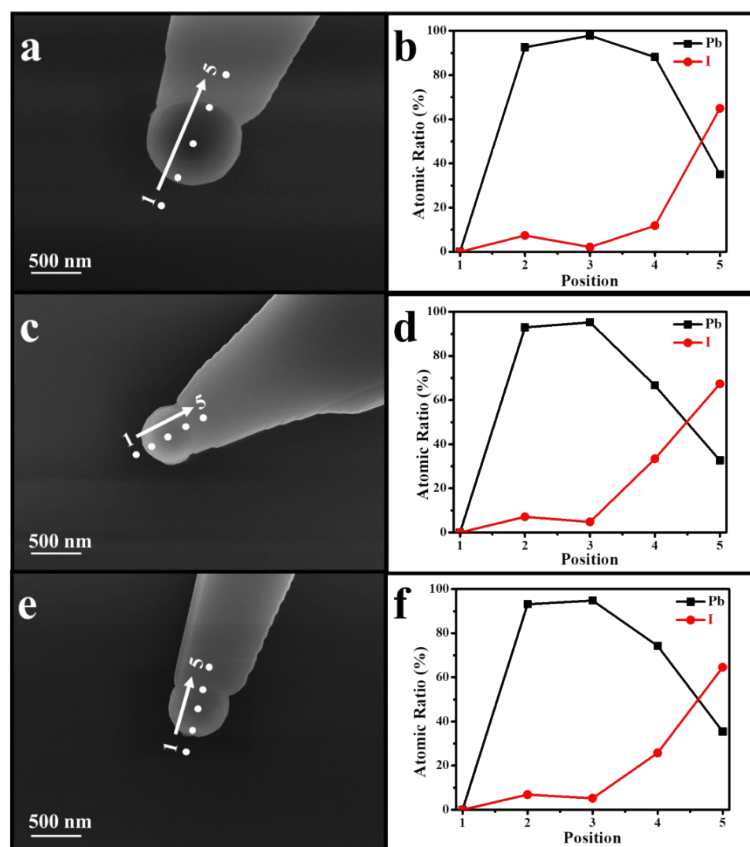

**Fig.S4** SEM images and EDS spectra of the tip sections of the as-prepared  $\text{PbI}_2$  nanobelts.

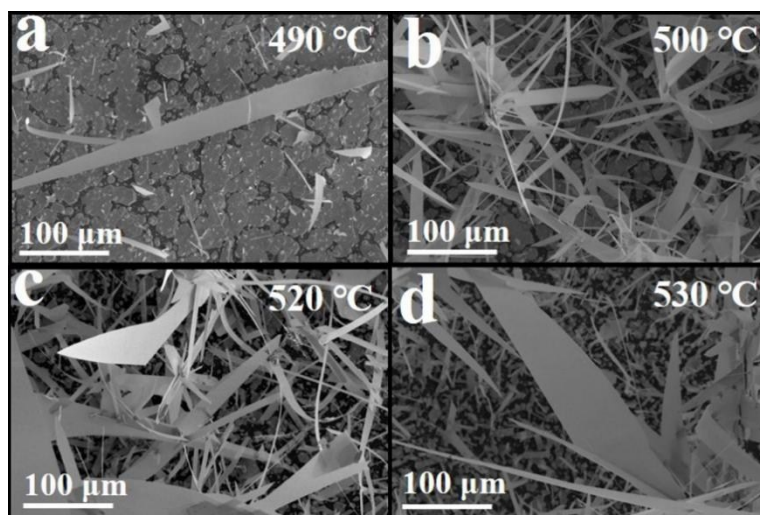

**Fig.S5** Effect of growth temperature on the nanobelts growth. (a, b, c, d) SEM images of the as-prepared  $\text{PbI}_2$  samples grown with different growth temperatures of 490 °C, 500 °C, 520 °C and 530 °C.

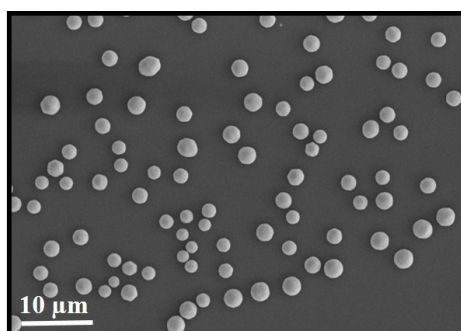

**Fig.S6** SEM image of the as-prepared sample grown with a rapid heating rate of the source material (reach 550 °C in 7 min).

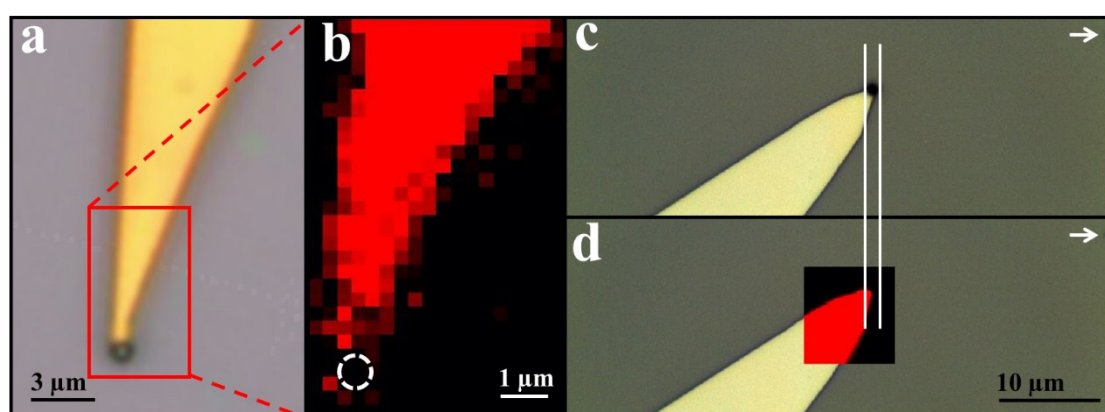

**Fig.S7** 2D PL mapping and Raman mapping at the tip sections of the as-prepared large-size PbI<sub>2</sub> nanobelts.

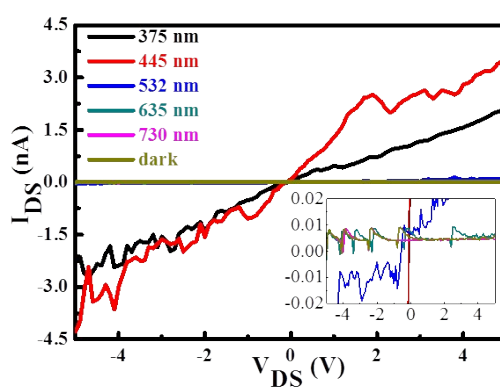

**Fig.S8**  $I_{DS}$ - $V_{DS}$  curves of the as-fabricated large-size PbI<sub>2</sub> nanobelt photodetectors with different incident light wavelength, inset is the amplified image.
